# Supplementary material for: Monitoring of Antimicrobial Resistance to Aminoglycosides and Macrolides in Campylobacter coli and Campylobacter jejuni From Healthy Livestock in Spain (2002–2018)
Source: Front Microbiol. 2021 Jul 2;12:689262. doi: 10.3389/fmicb.2021.689262 (PMC8283307; doi:10.3389/fmicb.2021.689262)
Supplement: Supplementary file 2 [file Table_2.xlsx]

## Sheet: campy_AMR_genes
reference_#	tree_group	Bact_spp	Host_spp	year	ERY	GEN	STR	cmeB	23S rRNA mutation	erm(B)	cmeR	cmeC	cmeA	aad(6)	aph(2'')-Ic	ant(6)-Ia	aph(3')-III	apmA	AAC(6')-Il	aadE-Cc
VE08/01742	1	C. coli	BROILERS	2008	1	1	1		1						1	1	1
ZTA11/01873	1	C. coli	BROILERS	2011	1	0	1	1	1							1
ZTA10/02488	1	C. coli	BROILERS	2010	1	1	1	1		1						1		1
ZTA09/02282	1	C. coli	PIGS	2009	1	1	1													1
ZTA10/00684	1	C. jejuni	BROILERS	2010	0	0	0	1			1	1	1
ZTA10/01432	1	C. jejuni	BROILERS	2010	0	0	0				1	1
ZTA10/01723	1	C. jejuni	BROILERS	2010	1	0	0	1			1	1	1
ZTA10/00758	1	C. jejuni	BROILERS	2010	0	0	0				1	1	1
ZTA10/00766	1	C. jejuni	BROILERS	2010	1	0	0	1			1	1	1
ZTA10/00909	1	C. jejuni	BROILERS	2010	0	0	1	1			1	1	1	1			1
ZTA10/00922	1	C. jejuni	BROILERS	2010	0	0	1	1			1	1	1	1			1
ZTA10/02105	1	C. jejuni	BROILERS	2010	0	0	1				1	1	1	1			1
ZTA10/01722	1	C. jejuni	BROILERS	2010	0	0	0				1	1	1
ZTA10/02640	1	C. jejuni	BROILERS	2010	0	0	0	1			1	1	1
ZTA10/01246	1	C. jejuni	BROILERS	2010	0	0	0				1	1	1
ZTA10/02641	1	C. jejuni	BROILERS	2010	0	0	0	1			1	1	1
ZTA11/02314	1	C. jejuni	BROILERS	2011	0	0	0	1			1	1	1
ZTA11/03523	1	C. jejuni	BROILERS	2011	0	0	0	1			1	1	1
ZTA10/00655	1	C. jejuni	CATTLE	2010	0	0	0	1			1	1	1
ZTA10/00681	1	C. jejuni	CATTLE	2010	0	0	0	1			1	1	1
ZTA10/00761	1	C. jejuni	CATTLE	2010	0	0	0	1			1	1	1
ZTA10/00900	1	C. jejuni	CATTLE	2010	0	0	0	1			1	1	1
ZTA10/02289	1	C. jejuni	CATTLE	2010	0	0	0	1			1	1	1
ZTA10/00749	1	C. coli	CATTLE	2010	0	0	1	1
ZTA10/00575	1	C. jejuni	CATTLE	2010	0	0	1	1			1	1	1	1		1	1
ZTA10/01536	1	C. jejuni	CATTLE	2010	0	0	1	1			1	1	1	1		1	1
ZTA11/00934	1	C. jejuni	CATTLE	2011	0	0	0				1	1	1
ZTA11/02069	1	C. jejuni	CATTLE	2011	0	0	1	1			1	1	1
ZTA09/02553	2	C. coli	BROILERS	2009	1	0	0	1
ZTA14/01086	2	C. coli	TURKEYS	2014	1	0	0	1		1
ZTA10/01043	2	C. jejuni	CATTLE	2010	0	0	0	1			1	1	1
ZTA09/01326	3	C. coli	BROILERS	2009	1	0	1													1
VE08/01737	3	C. coli	BROILERS	2008	1	1	1	1	1					1	1	1
ZTA09/02173	3	C. coli	PIGS	2009	1	0	1									1				1
ZTA14/01426	3	C. coli	TURKEYS	2014	1	1	1	1		1	1	1			1	1	1
ZTA11/02160	3	C. jejuni	CATTLE	2011	0	0	0	1			1	1	1						1
ZTA10/02577	4	C. jejuni	BROILERS	2010	0	0	1	1			1	1	1			1
ZTA11/01072	4	C. jejuni	BROILERS	2011	0	0	1	1			1	1	1			1
ZTA11/01874	4	C. jejuni	BROILERS	2011	0	0	1	1			1	1	1			1
ZTA11/02059	4	C. jejuni	BROILERS	2011	0	0	0	1			1	1	1
ZTA10/01617	4	C. jejuni	CATTLE	2010	0	0	1	1			1	1	1
ZTA10/00700	4	C. jejuni	CATTLE	2010	0	0	0	1			1	1	1
ZTA10/00951	4	C. jejuni	CATTLE	2010	0	0	0	1			1	1	1
ZTA10/02492	4	C. jejuni	CATTLE	2010	0	0	0	1			1	1	1
ZTA11/01842	4	C. jejuni	CATTLE	2011	0	0	0	1			1	1	1
ZTA10/02583	5	C. jejuni	CATTLE	2010	0	0	0	1			1	1	1
ZTA10/01185	5	C. jejuni	CATTLE	2010	0	0	0	1			1	1	1
ZTA10/01411	5	C. jejuni	CATTLE	2010	0	0	0	1			1	1	1
ZTA11/02705	5	C. jejuni	CATTLE	2011	0	0	0	1			1	1	1
ZTA11/01052	5	C. jejuni	CATTLE	2011	0	0	0	1			1	1	1
ZTA11/01530	5	C. jejuni	CATTLE	2011	0	0	0	1			1	1	1
					phenotype			macrolide genes						aminoglycoside genes
